# Supplementary material for: Red and Blue-Black Tin Monoxide, SnO: Pitfalls, Challenges, and Helpful Tools in Crystal Structure Determination of Low-Intensity Datasets from Microcrystals
Source: MDPI journal article supplement (doi:10.3390/cryst13081281), 2023-08-19
Supplement: s1 [file s1]

---

## Supplementary Materials

# ***Red and Blue-Black* Tin Monoxide, SnO: Pitfalls, Challenges, and Helpful Tools in Crystal Structure Determination of Low-Intensity Datasets from Microcrystals**

Hans Reuter

Chemistry, Department of Biology/Chemistry, Osnabrück University, Barbarastr. 7,  
49069 Osnabrück, Germany; hreuter@uos.de

---

## Table of contents

|                                                                                                      |    |
|------------------------------------------------------------------------------------------------------|----|
| Table S1. Atomic coordinates of black-blue SnO at ambient temperature.....                           | 3  |
| Table S2. Bond lengths and angles of black-blue SnO at ambient temperature.....                      | 4  |
| Table S3. Anisotropic thermal displacement parameters of black-blue SnO at ambient temperature. .... | 5  |
| Table S4. Atomic coordinates of black-blue SnO at 100 K.....                                         | 6  |
| Table S5. Bond lengths and angles of black-blue SnO at 100 K.....                                    | 7  |
| Table S6. Anisotropic thermal displacement parameters of black-blue SnO at 100 K.....                | 8  |
| Figure S1. Unit cell of red SnO in <i>Cmc2<sub>1</sub></i> .....                                     | 9  |
| Table S7. Crystallographic data of red SnO in <i>Cmc2<sub>1</sub></i> .....                          | 10 |
| Table S8. Atomic coordinates of red SnO in <i>Cmc2<sub>1</sub></i> .....                             | 11 |
| Table S9. Bond lengths and angles of red SnO in <i>Cmc2<sub>1</sub></i> .....                        | 12 |
| Table S10. Anisotropic thermal displacement parameters of red SnO in <i>Cmc2<sub>1</sub></i> .....   | 13 |
| Table S11. Atomic coordinates of red SnO in <i>Pbca</i> .....                                        | 14 |
| Table S12. Bond lengths and angles of red SnO in <i>Pbca</i> .....                                   | 15 |
| Table S13. Anisotropic thermal displacement parameters of red SnO in <i>Pbca</i> .....               | 16 |

---

**Table S1. Atomic coordinates of black-blue SnO at ambient temperature.**

Atomic coordinates ( $\times 10^4$ ) and equivalent isotropic displacement parameters ( $\text{\AA}^2 \times 10^3$ ) for black-blue SnO at ambient temperature.  $U(\text{eq})$  is defined as one third of the trace of the orthogonalized  $U_{ij}$  tensor.

|       | x    | y    | z        | $U(\text{eq})$ |
|-------|------|------|----------|----------------|
| Sn(1) | 2500 | 2500 | 2375 (1) | 11 (1)         |
| O(1)  | 7500 | 2500 | 0        | 13 (1)         |

---

**Table S2. Bond lengths and angles of black-blue SnO at ambient temperature.**

Bond lengths [Å] and angles [°] for black-blue SnO at ambient temperature.

---

|                      |           |
|----------------------|-----------|
| Sn(1)-O(1)#1         | 2.2213(1) |
| Sn(1)-O(1)#2         | 2.2213(1) |
| Sn(1)-O(1)#3         | 2.2213(1) |
| Sn(1)-O(1)           | 2.2213(1) |
|                      |           |
| O(1)#1-Sn(1)-O(1)#2  | 74.48(1)  |
| O(1)#1-Sn(1)-O(1)#3  | 117.71(1) |
| O(1)#2-Sn(1)-O(1)#3  | 74.48(1)  |
| O(1)#1-Sn(1)-O(1)    | 74.48(1)  |
| O(1)#2-Sn(1)-O(1)    | 117.71(1) |
| O(1)#3-Sn(1)-O(1)    | 74.48(1)  |
|                      |           |
| Sn(1)#1-O(1)-Sn(1)#4 | 105.52(1) |
| Sn(1)#1-O(1)-Sn(1)#3 | 117.71(1) |
| Sn(1)#4-O(1)-Sn(1)#3 | 105.52(1) |
| Sn(1)#1-O(1)-Sn(1)   | 105.52(1) |
| Sn(1)#4-O(1)-Sn(1)   | 117.71(1) |
| Sn(1)#3-O(1)-Sn(1)   | 105.52(1) |

---

Symmetry transformations used to generate equivalent atoms:

#1 -x+1,-y,-z      #2 x-1,y,z      #3 -x+1,-y+1,-z  
#4 x+1,y,z

**Table S3. Anisotropic thermal displacement parameters of black-blue SnO at ambient temperature.**

Anisotropic displacement parameters ( $\text{\AA}^2 \times 10^3$ ) for black-blue SnO at ambient temperature. The anisotropic displacement factor exponent takes the form:  
 $-2\pi^2 [h^2 a^{*2} U_{11} + \dots + 2hka^*b^*U_{12}]$

|       | U11   | U22   | U33   | U23 | U13 | U12 |
|-------|-------|-------|-------|-----|-----|-----|
| Sn(1) | 11(1) | 11(1) | 12(1) | 0   | 0   | 0   |
| O(1)  | 11(1) | 11(1) | 18(1) | 0   | 0   | 0   |

---

**Table S4. Atomic coordinates of black-blue SnO at 100 K.**

Atomic coordinates ( $\times 10^4$ ) and equivalent isotropic displacement parameters ( $\text{\AA}^2 \times 10^3$ ) for black-blue SnO at 100 K.  $U(\text{eq})$  is defined as one third of the trace of the orthogonalized  $U_{ij}$  tensor.

|       | x    | y    | z       | $U(\text{eq})$ |
|-------|------|------|---------|----------------|
| Sn(1) | 2500 | 2500 | 2380(1) | 4(1)           |
| O(1)  | 7500 | 2500 | 0       | 5(1)           |

---

**Table S5. Bond lengths and angles of black-blue SnO at 100 K.**

Bond lengths [Å] and angles [°] for black-blue SnO at 100 K.

---

|                      |           |
|----------------------|-----------|
| Sn(1)-O(1)#1         | 2.2213(1) |
| Sn(1)-O(1)#2         | 2.2213(1) |
| Sn(1)-O(1)#3         | 2.2213(1) |
| Sn(1)-O(1)           | 2.2213(1) |
|                      |           |
| O(1)#1-Sn(1)-O(1)#2  | 74.48(1)  |
| O(1)#1-Sn(1)-O(1)#3  | 117.71(1) |
| O(1)#2-Sn(1)-O(1)#3  | 74.48(1)  |
| O(1)#1-Sn(1)-O(1)    | 74.48(1)  |
| O(1)#2-Sn(1)-O(1)    | 117.71(1) |
| O(1)#3-Sn(1)-O(1)    | 74.48(1)  |
|                      |           |
| Sn(1)#1-O(1)-Sn(1)#4 | 105.52(1) |
| Sn(1)#1-O(1)-Sn(1)#3 | 117.71(1) |
| Sn(1)#4-O(1)-Sn(1)#3 | 105.52(1) |
| Sn(1)#1-O(1)-Sn(1)   | 105.52(1) |
| Sn(1)#4-O(1)-Sn(1)   | 117.71(1) |
| Sn(1)#3-O(1)-Sn(1)   | 105.52(1) |

---

Symmetry transformations used to generate equivalent atoms:

#1 -x+1,-y,-z    #2 x-1,y,z    #3 -x+1,-y+1,-z  
#4 x+1,y,z

**Table S6. Anisotropic thermal displacement parameters of black-blue SnO at 100 K.**

Anisotropic displacement parameters ( $\text{\AA}^2 \times 10^3$ ) for black-blue SnO at 100 K.

The anisotropic displacement factor exponent takes the form:

$$-2\pi^2 [h^2 a^{*2} U_{11} + \dots + 2hka^*b^*U_{12}]$$

|       | U11   | U22   | U33   | U23 | U13 | U12 |
|-------|-------|-------|-------|-----|-----|-----|
| Sn(1) | 4 (1) | 4 (1) | 4 (1) | 0   | 0   | 0   |
| O(1)  | 4 (1) | 4 (1) | 8 (1) | 0   | 0   | 0   |



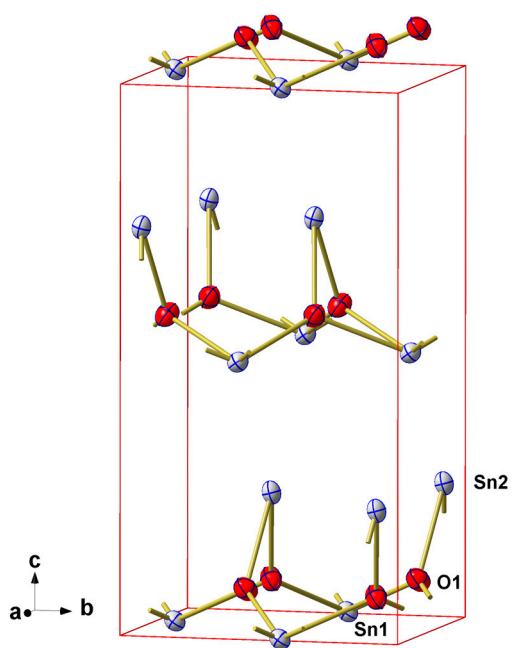

Figure S1. Unit cell of red SnO in  $Cmc2_1$ .

**Table S7. Crystallographic data of red SnO in *Cmc2<sub>1</sub>***

|                                   |                                                        |
|-----------------------------------|--------------------------------------------------------|
| Empirical formula                 | O Sn                                                   |
| Formula weight                    | 134.69                                                 |
| Temperature                       | 296(2) K                                               |
| Wavelength                        | 0.71073 Å                                              |
| Crystal system, space group       | Orthorhombic, <i>Cmc2<sub>1</sub></i>                  |
| Unit cell dimensions              | a = 5.0116(3) Å<br>b = 5.7445(4) Å<br>c = 11.0600(6) Å |
| Volume                            | 318.41(3) Å <sup>3</sup>                               |
| Z, Calculated density             | 8, 5.619 Mg/m <sup>3</sup>                             |
| Absorption coefficient            | 15.433 mm <sup>-1</sup>                                |
| F(000)                            | 464                                                    |
| Crystal size                      | 0.015 x 0.015 x 0.015 mm                               |
| Theta range for data collection   | 3.684 to 28.979 deg.                                   |
| Limiting indices                  | -6<=h<=6, -7<=k<=7, -15<=l<=15                         |
| Reflections collected / unique    | 14367 / 466 [R(int) = 0.0591]                          |
| Completeness to theta = 25.242    | 100.0 %                                                |
| Absorption correction             | Semi-empirical from equivalents                        |
| Max. and min. transmission        | 0.813 and 0.674                                        |
| Refinement method                 | Full-matrix least-squares on F <sup>2</sup>            |
| Data / restraints / parameters    | 466 / 1 / 23                                           |
| Goodness-of-fit on F <sup>2</sup> | 1.225                                                  |
| Final R indices [I>2sigma(I)]     | R1 = 0.0296, wR2 = 0.0698                              |
| R indices (all data)              | R1 = 0.0339, wR2 = 0.0758                              |
| Absolute structure parameter      | 0.5(4)                                                 |
| Extinction coefficient            | n/a                                                    |
| Largest diff. peak and hole       | 2.622 and -1.264 e.Å <sup>-3</sup>                     |

---

**Table S8. Atomic coordinates of red SnO in  $Cmc2_1$ .**

Atomic coordinates ( $\times 10^4$ ) and equivalent isotropic displacement parameters ( $\text{\AA}^2 \times 10^3$ ) for red SnO.  $U(\text{eq})$  is defined as one third of the trace of the orthogonalized  $U_{ij}$  tensor.

|       | x        | y        | z       | $U(\text{eq})$ |
|-------|----------|----------|---------|----------------|
| Sn(1) | 0        | 5761(3)  | 27(1)   | 21(1)          |
| Sn(2) | 0        | 9238(3)  | 2414(1) | 22(1)          |
| O(1)  | 1870(20) | 8770(20) | 747(10) | 30(2)          |

---

**Table S9. Bond lengths and angles of red SnO in *Cmc2*<sub>1</sub>.**

Bond lengths [Å] and angles [°] for red SnO in *Cmc2*<sub>1</sub>.

|                     |           |
|---------------------|-----------|
| Sn(1)-O(1)#1        | 2.098(12) |
| Sn(1)-O(1)#2        | 2.098(12) |
| Sn(1)-O(1)#3        | 2.121(11) |
| Sn(1)-O(1)          | 2.121(11) |
| Sn(2)-O(1)#3        | 2.087(11) |
| Sn(2)-O(1)          | 2.087(11) |
| O(1)#1-Sn(1)-O(1)#2 | 96.6(7)   |
| O(1)#1-Sn(1)-O(1)#3 | 88.4(3)   |
| O(1)#2-Sn(1)-O(1)#3 | 129.3(6)  |
| O(1)#1-Sn(1)-O(1)   | 129.3(6)  |
| O(1)#2-Sn(1)-O(1)   | 88.4(3)   |
| O(1)#3-Sn(1)-O(1)   | 52.6(7)   |
| O(1)#3-Sn(2)-O(1)   | 53.5(7)   |
| Sn(2)-O(1)-Sn(1)#4  | 126.9(6)  |
| Sn(2)-O(1)-Sn(1)    | 103.8(5)  |
| Sn(1)#4-O(1)-Sn(1)  | 129.3(6)  |

---

Symmetry transformations used to generate equivalent atoms:

#1  $x-1/2, y-1/2, z$       #2  $-x+1/2, y-1/2, z$   
#3  $-x, y, z$       #4  $x+1/2, y+1/2, z$

**Table S10. Anisotropic thermal displacement parameters of red SnO in *Cmc2<sub>1</sub>*.**

Anisotropic displacement parameters ( $\text{\AA}^2 \times 10^3$ ) for red SnO in *Cmc2<sub>1</sub>*.

The anisotropic displacement factor exponent takes the form:

$$-2\pi^2 [h^2 a^{*2} U_{11} + \dots + 2hka^*b^*U_{12}]$$

|       | U11   | U22   | U33   | U23 | U13 | U12 |
|-------|-------|-------|-------|-----|-----|-----|
| Sn(1) | 4 (1) | 4 (1) | 4 (1) | 0   | 0   | 0   |
| O(1)  | 4 (1) | 4 (1) | 8 (1) | 0   | 0   | 0   |

---

**Table S11. Atomic coordinates of red SnO in *Pbca*.**

Atomic coordinates ( $\times 10^4$ ) and equivalent isotropic displacement parameters ( $\text{\AA}^2 \times 10^3$ ) for red SnO in *Pbca*.  $U(\text{eq})$  is defined as one third of the trace of the orthogonalized  $U_{ij}$  tensor.

|       | x       | y       | z       | $U(\text{eq})$ |
|-------|---------|---------|---------|----------------|
| Sn(1) | 5084(1) | 8262(1) | 3806(1) | 21(1)          |
| O(1)  | 8107(9) | 6264(9) | 4519(5) | 25(1)          |

---

**Table S12. Bond lengths and angles of red SnO in *Pbca*.**

Bond lengths [Å] and angles [°] for red SnO in *Pbca*.

---

|                      |          |
|----------------------|----------|
| Sn(1)-O(1)           | 2.057(5) |
| Sn(1)-O(1)#1         | 2.102(5) |
| Sn(1)-O(1)#2         | 2.118(5) |
| O(1)-Sn(1)-O(1)#1    | 89.8(1)  |
| O(1)-Sn(1)-O(1)#2    | 94.6(1)  |
| O(1)#1-Sn(1)-O(1)#2  | 76.6(2)  |
| Sn(1)-O(1)-Sn(1)#3   | 129.1(2) |
| Sn(1)-O(1)-Sn(1)#4   | 127.4(2) |
| Sn(1)#3-O(1)-Sn(1)#4 | 103.4(2) |

---

Symmetry transformations used to generate equivalent atoms:

#1  $-x+3/2, y+1/2, z$       #2  $x-1/2, -y+3/2, -z+1$   
#3  $-x+3/2, y-1/2, z$       #4  $x+1/2, -y+3/2, -z+1$

---

**Table S13. Anisotropic thermal displacement parameters of red SnO in *Pbca*.**

Anisotropic displacement parameters ( $\text{\AA}^2 \times 10^3$ ) for red SnO in *Pbca*.

The anisotropic displacement factor exponent takes the form:

$$-2\pi^2 [h^2 a^{*2} U_{11} + \dots + 2hka^*b^*U_{12}]$$

---

|        | U11    | U22    | U33    | U23    | U13    | U12   |
|--------|--------|--------|--------|--------|--------|-------|
| <hr/>  |        |        |        |        |        |       |
| Sn (1) | 17 (1) | 21 (1) | 24 (1) | -2 (1) | -3 (1) | 0 (1) |
| O (1)  | 19 (2) | 23 (2) | 33 (3) | -5 (2) | -5 (2) | 5 (2) |

---
